# Supplementary material
Source: MDPI journal article supplement (https://www.mdpi.com/2073-4441/15/11/2139)
Supplement: s1 [file s1]

# Multifrequency Downstream Hydraulic Geometry of Alluvial Mountain Rivers Located on the Qinghai–Tibet Plateau

Chao Qin <sup>1,2,3</sup>, Baosheng Wu <sup>1,2,3</sup>, Yuan Xue <sup>1,2,3,\*</sup>, Xudong Fu <sup>1,2,3</sup>, Guangqian Wang <sup>1,2,3</sup> and Ge Wang <sup>1,2,3</sup>

<sup>1</sup> State Key Laboratory of Hydrosience and Engineering, Tsinghua University, Beijing 100084, China; glqinchao@nwsuaf.edu.cn (C.Q.); xdfu@tsinghua.edu.cn (X.F.); dhhwgq@mail.tsinghua.edu.cn (G.W.); wangg19@mails.tsinghua.edu.cn (G.W.)

<sup>2</sup> Key Laboratory of Hydrosphere Sciences of the Ministry of Water Resources, Tsinghua University, Beijing 100084, China

<sup>3</sup> Department of Hydraulic Engineering, Tsinghua University, Beijing 100084, China

\* Correspondence: xueyuan\_thu@163.com

## Contents of this file

Tables S1

Figure S1

## Introduction

The Supporting Information includes one table and one figure. Tables S1 presents the basic information (locations, upstream contributing area, and distance to estuary, bed and bank material) for 129 cross sections. Figure S1 shows the nine scenarios of the convergence of DHG curves.

**Table S1.** Cross sections studied in this research and their locations, slopes, upstream contributing areas, recurrence intervals of bankfull discharge and bed/bank materials.

| Cross section ID | River system | Full name of cross sections | Flow to        | Longitude (°) | Latitude (°) | Altitude (m) | Slope (‰) | Contributing area (10 <sup>4</sup> km <sup>2</sup> ) | Recurrence intervals of bankfull discharge | Remarks                                      |
|------------------|--------------|-----------------------------|----------------|---------------|--------------|--------------|-----------|------------------------------------------------------|--------------------------------------------|----------------------------------------------|
| 1                | Yellow River | Heilin River                | Beichuan River | 101.4         | 37.083       | 2760         | 13.95     | 0.028                                                | 1.63                                       | Inside the QTP; bed: sandy gravel            |
| 2                | Yellow River | Yellow River1               | Bohai Sea      | 98.169        | 34.89        | 4214         | 2.46      | 2.093                                                | 2.05                                       | Inside the QTP; bed: fine sand               |
| 3                | Yellow River | Yellow River2               | Bohai Sea      | 99.65         | 33.767       | 3959         | 1.99      | 4.502                                                | 1.15                                       | Inside the QTP; bed: coarse sand             |
| 4                | Yellow River | Yellow River3               | Bohai Sea      | 101.046       | 33.767       | 3636         | 1.1       | 5.966                                                | 1.15                                       | Inside the QTP; bed: sandy gravel            |
| 5                | Yellow River | Yellow River4               | Bohai Sea      | 102.083       | 33.958       | 3412         | 1.24      | 8.605                                                | 1.15                                       | Inside the QTP; bed: sandy gravel            |
| 6                | Yellow River | Yellow River5               | Bohai Sea      | 100.651       | 34.688       | 3081         | 4.41      | 9.841                                                | 1.15                                       | Inside the QTP; bed: sandy gravel            |
| 7                | Yellow River | Yellow River6               | Bohai Sea      | 100.15        | 35.5         | 2689         | 7.94      | 12.197                                               | 1.15                                       | Inside the QTP; bed: sandy gravel            |
| 8                | Yellow River | Yellow River7               | Bohai Sea      | 101.405       | 36.045       | 2200         | 8.38      | 13.365                                               | 1.15                                       | Inside the QTP; bed: sandy gravel            |
| 9                | Yellow River | Yellow River8               | Bohai Sea      | 102.45        | 35.868       | 1864         | 1.71      | 14.533                                               | 1.30                                       | Inside the QTP; bed: sandy gravel            |
| 10               | Yellow River | Yellow River9               | Bohai Sea      | 103.333       | 35.933       | 1631         | 3.67      | 18.177                                               | 1.20                                       | Transient region; bed: sandy gravel          |
| 11               | Yellow River | Yellow River10              | Bohai Sea      | 103.245       | 36.027       | 1619         | 3.26      | 18.282                                               | 2.05                                       | Transient region; bed: sandy gravel          |
| 12               | Yellow River | Yellow River11              | Bohai Sea      | 103.817       | 36.067       | 1518         | 2.25      | 22.255                                               | 1.15                                       | Transient region; bed: sandy gravel          |
| 13               | Yellow River | Bayan Gou River             | Yellow River   | 102.251       | 36.1         | 2796         | 18.83     | 0.022                                                | 1.72                                       | Inside the QTP; bed: sandy gravel            |
| 14               | Yellow River | Bai River                   | Yellow River   | 102.452       | 33.417       | 3428         | 2.22      | 0.537                                                | 7.19                                       | Inside the QTP; bed: fine sand               |
| 15               | Yellow River | Daxia River1                | Yellow River   | 102.484       | 35.182       | 2957         | 7.94      | 0.169                                                | 1.27                                       | Inside the QTP; bed: sandy gravel            |
| 16               | Yellow River | Daxia River2                | Yellow River   | 103.05        | 35.483       | 2040         | 8.01      | 0.614                                                | 1.27                                       | Transient region; bed: sandy gravel          |
| 17               | Yellow River | Daxia River3                | Yellow River   | 103.26        | 35.636       | 1835         | 5.25      | 0.684                                                | 1.27                                       | Transient region; bed: sandy gravel          |
| 18               | Yellow River | Hei River1                  | Yellow River   | 102.935       | 33.601       | 3437         | 1.73      | 0.4                                                  | 4.81                                       | Inside the QTP; bed: fine sand and Rubble    |
| 19               | Yellow River | Hei River2                  | Yellow River   | 102.263       | 33.99        | 3427         | 4.04      | 0.742                                                | 4.81                                       | Inside the QTP; bed: fine sand               |
| 20               | Yellow River | Huangshui River1            | Yellow River   | 101.015       | 36.9         | 2995         | 4.93      | 0.138                                                | 2.28                                       | Inside the QTP; bed: fine sand               |
| 21               | Yellow River | Huangshui River2            | Yellow River   | 101.267       | 36.682       | 2628         | 6.03      | 0.303                                                | 2.58                                       | Inside the QTP; bed: fine sand               |
| 22               | Yellow River | Huangshui River3            | Yellow River   | 101.783       | 36.632       | 2226         | 2.73      | 0.902                                                | 2.34                                       | Inside the QTP; bed: fine sand               |
| 23               | Yellow River | Huangshui River4            | Yellow River   | 102.424       | 36.474       | 1968         | 3.52      | 1.303                                                | 2.16                                       | Inside the QTP; bed: fine sand               |
| 24               | Yellow River | Huangshui River5            | Yellow River   | 102.809       | 36.337       | 1761         | 6.32      | 1.534                                                | 2.34                                       | Transient region; bed: sandy gravel          |
| 25               | Yellow River | Longwu River                | Yellow River   | 102.022       | 35.516       | 2482         | 10.46     | 0.283                                                | 1.43                                       | Inside the QTP; bed: sandy gravel and pebble |
| 26               | Yellow River | Qingshui River              | Yellow River   | 102.551       | 35.834       | 1884         | 22.47     | 0.069                                                | 2.02                                       | Inside the QTP; bed: sandy gravel            |
| 27               | Yellow River | Requ River                  | Yellow River   | 98.267        | 34.6         | 4209         | 3.02      | 0.645                                                | 2.15                                       | Inside the QTP; bed: coarse sand             |
| 28               | Yellow River | Shakequ River               | Yellow River   | 101.491       | 33.433       | 3619         | 2.76      | 0.125                                                | 2.41                                       | Inside the QTP; bed: sandy gravel            |

|    |              |                     |                |         |        |      |       |        |      |                                                    |
|----|--------------|---------------------|----------------|---------|--------|------|-------|--------|------|----------------------------------------------------|
| 29 | Yellow River | Tao River1          | Yellow River   | 102.459 | 34.601 | 3121 | 5.63  | 0.504  | 4.85 | Inside the QTP; bed: sandy gravel                  |
| 30 | Yellow River | Tao River2          | Yellow River   | 103.567 | 35.8   | 1747 | 1.23  | 2.497  | 6.62 | Transient region; bed: sandy gravel                |
| 31 | Yellow River | Zhuanglang River1   | Yellow River   | 103.187 | 36.87  | 2272 | 13.91 | 0.2    | 2.63 | Transient region; bed: sandy gravel                |
| 32 | Yellow River | Zhuanglang River2   | Yellow River   | 103.444 | 36.184 | 1571 | 8.69  | 0.401  | 3.66 | Transient region; bed: sandy gravel and flagstone  |
| 33 | Yellow River | Zuli River1         | Yellow River   | 105.05  | 35.685 | 1715 | 14.36 | 0.099  | 2.87 | Transient region; bed: fine sand                   |
| 34 | Yellow River | Zuli River2         | Yellow River   | 104.88  | 36.217 | 1526 | 4.34  | 0.547  | 2.87 | Transient region; bed: fine sand                   |
| 35 | Yellow River | Zuli River3         | Yellow River   | 104.66  | 36.549 | 1404 | 2.22  | 1.065  | 2.87 | Transient region; bed: fine sand                   |
| 36 | Yellow River | Bazhou Gou River    | Hungshui River | 102.793 | 36.317 | 1803 | 17.32 | 0.019  | 2.23 | Inside the QTP; bed: sandy gravel                  |
| 37 | Yellow River | Beichuan River1     | Hungshui River | 101.35  | 37.256 | 3007 | 7.02  | 0.078  | 2.41 | Inside the QTP; bed: sandy gravel                  |
| 38 | Yellow River | Beichuan River2     | Hungshui River | 101.684 | 36.934 | 2444 | 5.75  | 0.277  | 1.35 | Inside the QTP; bed: sandy gravel                  |
| 39 | Yellow River | Datong River1       | Hungshui River | 100.517 | 37.749 | 3448 | 4     | 0.458  | 1.01 | Inside the QTP; bed: sandy gravel                  |
| 40 | Yellow River | Datong River2       | Hungshui River | 101.417 | 37.458 | 2935 | 3.03  | 0.801  | 1.16 | Inside the QTP; bed: sandy gravel                  |
| 41 | Yellow River | Datong River3       | Hungshui River | 102.498 | 36.95  | 2276 | 6.75  | 1.257  | 1.16 | Transient region; bed: sandy gravel                |
| 42 | Yellow River | Datong River4       | Hungshui River | 102.817 | 36.602 | 1922 | 7.98  | 1.391  | 1.16 | Transient region; bed: sandy gravel                |
| 43 | Yellow River | Nanchuan River      | Hungshui River | 101.774 | 36.626 | 2244 | 10.99 | 0.04   | 6.49 | Inside the QTP; bed: sandy gravel                  |
| 44 | Yellow River | Shatang Chuan River | Hungshui River | 101.874 | 36.573 | 2185 | 7.77  | 0.111  | 2.53 | Inside the QTP; bed: sandy gravel                  |
| 45 | Yellow River | Xina Chuan River    | Hungshui River | 101.483 | 36.767 | 2484 | 25.03 | 0.081  | 3.57 | Inside the QTP; bed: sandy gravel and pebble       |
| 46 | Yellow River | Xiaonan Chuan River | Hungshui River | 101.936 | 36.55  | 2168 | 13.16 | 0.037  | 4.98 | Inside the QTP; bed: sandy gravel                  |
| 47 | Yellow River | Yaoshui River       | Hungshui River | 101.273 | 36.667 | 2639 | 11.99 | 0.064  | 3.01 | Inside the QTP; bed: sandy gravel                  |
| 48 | Yellow River | Yinsheng Gou River  | Hungshui River | 102.409 | 36.517 | 2066 | 15.81 | 0.046  | 2.23 | Inside the QTP; bed: sandy gravel                  |
| 49 | Yellow River | Suji River          | Sancha River   | 103.7   | 35.375 | 2005 | 6.78  | 0.033  | 3.11 | Transient region; bed: sandy gravel                |
| 50 | Yellow River | Bola River          | Tao River      | 102.997 | 34.711 | 2795 | 7.53  | 0.17   | 2.9  | Inside the QTP; bed: sandy gravel                  |
| 51 | Yellow River | Dayu Gou River      | Tao River      | 103.589 | 34.567 | 2500 | 7.58  | 0.078  | 1.17 | Inside the QTP; bed: Quartzite and sandy gravel    |
| 52 | Yellow River | Dongyu Gou River1   | Tao River      | 104.052 | 35.301 | 2042 | 7.67  | 0.027  | 2.58 | Transient region; bed: sandy gravel                |
| 53 | Yellow River | Dongyu Gou River2   | Tao River      | 103.868 | 35.401 | 1881 | 6.31  | 0.058  | 2.58 | Transient region; bed: sandy gravel                |
| 54 | Yellow River | Guangtong River     | Tao River      | 103.733 | 35.554 | 1840 | 3.62  | 0.152  | 1.57 | Transient region; bed: sandy gravel                |
| 55 | Yellow River | Manba River         | Tao River      | 103.833 | 35.248 | 1936 | 10.75 | 0.046  | 2.79 | Transient region; bed: sandy gravel and sandy clay |
| 56 | Yellow River | Yemu River          | Tao River      | 103.667 | 34.961 | 2182 | 6.7   | 0.119  | 2.9  | Transient region; bed: sandy gravel                |
| 57 | Yellow River | Xinglong River      | Wanchuan River | 104.064 | 35.8   | 2196 | 41.79 | 0.008  | 6.49 | Transient region; bed: sandy gravel                |
| 58 | Jinsha River | Tuotuo River        | Tongtian River | 92.45   | 34.217 | 4533 | 1.19  | 1.592  | 1.94 | Inside the QTP; bed: sandy gravel                  |
| 59 | Jinsha River | Tongtian River      | Jinsha River   | 97.217  | 33.033 | 3541 | 1.35  | 13.77  | 1.94 | Inside the QTP; bed: gravel                        |
| 60 | Jinsha River | Jinsha River3       | East Sea       | 98.583  | 31.633 | 3042 | 1.22  | 14.907 | 1.75 | Inside the QTP; bed: sandy gravel                  |

|    |              |                   |               |         |        |      |       |        |      |                                                              |
|----|--------------|-------------------|---------------|---------|--------|------|-------|--------|------|--------------------------------------------------------------|
| 61 | Jinsha River | Jinsha River4     | East Sea      | 99.017  | 29.767 | 2470 | 0.68  | 18.006 | 1.75 | Inside the QTP; bed: sandy gravel                            |
| 62 | Jinsha River | Jinsha River5     | East Sea      | 99.283  | 28.233 | 2005 | 1.82  | 20.332 | 1.75 | Inside the QTP; bed: sandy gravel                            |
| 63 | Jinsha River | Jinsha River6     | East Sea      | 99.933  | 26.9   | 1818 | 0.7   | 21.418 | 1.75 | Transient region; bed: sandy gravel                          |
| 64 | Jinsha River | Jinsha River7     | East Sea      | 100.5   | 27.35  | 1414 | 1.7   | 23.54  | 1.75 | Transient region; bed: sandy gravel                          |
| 65 | Jinsha River | Jinsha River8     | East Sea      | 100.433 | 26.8   | 1304 | 2.03  | 23.985 | 1.75 | Transient region; bed: sandy gravel                          |
| 66 | Jinsha River | Jinsha River9     | East Sea      | 100.417 | 26.5   | 1223 | 1.06  | 24.145 | 1.75 | Transient region; bed: sandy gravel                          |
| 67 | Jinsha River | Jinsha River10    | East Sea      | 100.55  | 26.233 | 1183 | 1.14  | 24.449 | 1.75 | Transient region; bed: sandy gravel                          |
| 68 | Jinsha River | Jinsha River11    | East Sea      | 101.717 | 26.583 | 987  | 1.88  | 25.918 | 1.75 | Transient region; bed: rocky sand                            |
| 69 | Jinsha River | Batang River      | Jinsha River  | 97.05   | 33.017 | 3657 | 5.12  | 0.23   | 1.57 | Inside the QTP; bed: gravel                                  |
| 70 | Jinsha River | Chongjiang River  | Jinsha River  | 99.933  | 26.85  | 1839 | 4.03  | 0.1    | 1.94 | Transient region; bed: sandy gravel; Width AHG was not used. |
| 71 | Jinsha River | Wulang River      | Jinsha River  | 100.567 | 26.8   | 1589 | 1.11  | 0.208  | 2.53 | Transient region; bed: sandy gravel                          |
| 72 | Jinsha River | Lapu River        | Jinsha River  | 99.4    | 27.6   | 2011 | 6.1   | 0.072  | 1.94 | Transient region; bed: sandy gravel                          |
| 73 | Jinsha River | Luolou River      | Jinsha River  | 100.367 | 26.083 | 1346 | 7.9   | 0.083  | 1.94 | Transient region; bed: sandy gravel                          |
| 74 | Jinsha River | Maguo River       | Jinsha River  | 101     | 26.483 | 1353 | 11.98 | 0.085  | 1.94 | Transient region; bed: sandy gravel                          |
| 75 | Jinsha River | Pao River         | Jinsha River  | 101     | 25.683 | 1576 | 6.68  | 0.195  | 1.94 | Transient region; bed: sandy gravel                          |
| 76 | Jinsha River | Sangyuan River    | Jinsha River  | 100.55  | 25.95  | 1389 | 5.8   | 0.157  | 1.43 | Transient region; bed: sandy gravel                          |
| 77 | Jinsha River | Shuoduogang River | Jinsha River  | 100.05  | 27.183 | 1834 | 17.92 | 0.192  | 1.94 | Transient region; bed: sandy gravel                          |
| 78 | Jinsha River | Songmai River     | Jinsha River  | 99.25   | 28.417 | 2087 | 2.45  | 1.216  | 1.94 | Transient region; bed: sandy gravel                          |
| 79 | Jinsha River | Wanma River       | Jinsha River  | 101.417 | 26.167 | 1569 | 11.24 | 0.053  | 1.94 | Transient region; bed: bed rock with fine sand               |
| 80 | Jinsha River | Xinzhuang River   | Jinsha River  | 101.367 | 26.6   | 1074 | 6.77  | 0.091  | 1.94 | Transient region; bed: sandy gravel                          |
| 81 | Jinsha River | Yanggong River1   | Jinsha River  | 100.283 | 26.8   | 2363 | 0.65  | 0.054  | 1.94 | Transient region; bed: sandy gravel                          |
| 82 | Jinsha River | Yanggong River2   | Jinsha River  | 100.217 | 26.5   | 2198 | 13.47 | 0.121  | 1.94 | Transient region; bed: fine sand                             |
| 83 | Yalong River | Sunshui River     | Anning River  | 102.2   | 28.3   | 1634 | 7.06  | 0.161  | 2.66 | Transient region; bed: gravel with fine sand                 |
| 84 | Yalong River | Yalong River1     | Jinsha River  | 99.967  | 31.617 | 3347 | 1.96  | 3.293  | 2.66 | Inside the QTP; bed: sandy gravel                            |
| 85 | Yalong River | Yalong River2     | Jinsha River  | 101.017 | 30.033 | 2566 | 6.74  | 6.687  | 2.66 | Inside the QTP; bed: gravel                                  |
| 86 | Yalong River | Yalong River3     | Jinsha River  | 101.867 | 28.45  | 1433 | 1.54  | 10.808 | 2.66 | Transient region; bed: sandy gravel                          |
| 87 | Yalong River | Yalong River4     | Jinsha River  | 101.85  | 26.683 | 992  | 1.49  | 12.836 | 2.66 | Transient region; bed: sandy gravel                          |
| 88 | Yalong River | Ninglang River    | Qiansuo River | 100.867 | 27.283 | 2254 | 4.14  | 0.084  | 2.66 | Inside the QTP; bed: sandy gravel                            |
| 89 | Yalong River | Niqu River        | Xianhui River | 100.683 | 31.433 | 3177 | 3.66  | 0.686  | 2.66 | Inside the QTP; bed: sandy gravel                            |
| 90 | Yalong River | Anning River      | Yalong River  | 102.183 | 28.3   | 1621 | 2.46  | 0.209  | 2.66 | Transient region; bed: sandy gravel                          |
| 91 | Yalong River | Jiulong River     | Yalong River  | 101.65  | 28.65  | 2042 | 35.79 | 0.241  | 2.66 | Transient region; bed: sandy gravel                          |
| 92 | Yalong River | Litang River1     | Yalong River  | 100.383 | 29.7   | 3651 | 6.58  | 0.31   | 2.66 | Inside the QTP; bed: sandy gravel                            |
| 93 | Yalong River | Litang River2     | Yalong River  | 101.017 | 27.95  | 1894 | 4.97  | 0.916  | 2.66 | Transient region; bed: sandy gravel                          |

|     |                |                 |                |         |        |      |       |        |      |                                                                                          |
|-----|----------------|-----------------|----------------|---------|--------|------|-------|--------|------|------------------------------------------------------------------------------------------|
| 94  | Yalong River   | Xianshui River  | Yalong River   | 101.067 | 31.033 | 2975 | 2.2   | 1.447  | 2.66 | Inside the QTP; bed: sandy gravel                                                        |
| 95  | Yalong River   | Xiaojin River   | Yalong River   | 101.267 | 27.833 | 1772 | 2.18  | 1.781  | 2.66 | Transient region; bed: sandy gravel                                                      |
| 96  | Lantsang River | Bi River        | Lantsang River | 99.4    | 26.4   | 2265 | 8.77  | 0.045  | 3.13 | Transient region; bed: sandy gravel; banks: clay and gravel                              |
| 97  | Lantsang River | Buyuan River    | Lantsang River | 101.266 | 21.917 | 539  | 5.96  | 0.621  | 2.72 | Transient region; bed: pebble; banks: sandy loam                                         |
| 98  | Lantsang River | Heihui River1   | Lantsang River | 99.909  | 26.454 | 2193 | 2.24  | 0.092  | 2.72 | Transient region; bed: clay; banks: loose soil                                           |
| 99  | Lantsang River | Heihui River2   | Lantsang River | 100     | 25.65  | 1505 | 6.85  | 0.433  | 2.72 | Transient region; bed: sandy clay; banks: sandy soil                                     |
| 100 | Lantsang River | Heihui River3   | Lantsang River | 100.01  | 25.351 | 1226 | 10.71 | 0.939  | 2.72 | Transient region; bed: gravel sand; banks: bare rock                                     |
| 101 | Lantsang River | Heijiang River  | Lantsang River | 100.4   | 22.859 | 1033 | 7.83  | 0.845  | 2.72 | Transient region; banks: pebble                                                          |
| 102 | Lantsang River | Liusha River    | Lantsang River | 100.417 | 21.953 | 1170 | 6.52  | 0.103  | 2.05 | Transient region; bed: pebble and mud; banks: sandy loam                                 |
| 103 | Lantsang River | Nanla River     | Lantsang River | 101.55  | 21.433 | 623  | 2.73  | 0.131  | 3.39 | Transient region; bed: pebble; banks: loose sandy loam                                   |
| 104 | Lantsang River | Shundian River  | Lantsang River | 100.298 | 24.493 | 1044 | 8.5   | 0.291  | 2.72 | Transient region; bed: sandy gravel; left bank: decayed rock; right bank: rock with soil |
| 105 | Lantsang River | Yin River       | Lantsang River | 99.539  | 25.419 | 1578 | 5.85  | 0.038  | 2.72 | Transient region; bed: sandy gravel; left bank: farmland; right bank: high mountains     |
| 106 | Lantsang River | Yongchun River  | Lantsang River | 99.322  | 27.152 | 2254 | 28.42 | 0.02   | 2.72 | Transient region; bed: pebble                                                            |
| 107 | Lantsang River | Zaqu River      | Lantsang River | 96.538  | 32.154 | 3609 | 8.03  | 1.791  | 2.72 | Inside the QTP; bed: sandy gravel; left bank: steep rock; right bank: farmland           |
| 108 | Lantsang River | Lantsang River1 | Mekong River   | 97.187  | 31.183 | 3251 | 9.61  | 5.38   | 2.72 | Inside the QTP; bed: big pebble                                                          |
| 109 | Lantsang River | Lantsang River2 | Mekong River   | 99.219  | 25.783 | 1292 | 6.24  | 8.805  | 2.72 | Transient region; bed: sandy gravel; banks: sandy soil with gravel                       |
| 110 | Lantsang River | Lantsang River3 | Mekong River   | 100.498 | 24.534 | 897  | 9.56  | 10.853 | 2.72 | Transient region; bed: bed rock; right bank: freestone                                   |
| 111 | Lantsang River | Lantsang River4 | Mekong River   | 100.169 | 23.55  | 748  | 9.6   | 11.589 | 2.72 | Transient region; bed: sandy gravel; banks: bed rock and gravel                          |
| 112 | Lantsang River | Lantsang River5 | Mekong River   | 100.785 | 22.035 | 535  | 1.89  | 14.178 | 2.72 | Transient region; bed: fine sand and pebble                                              |

|     |                      |                       |                      |        |        |      |      |        |      |                                                                                             |
|-----|----------------------|-----------------------|----------------------|--------|--------|------|------|--------|------|---------------------------------------------------------------------------------------------|
| 113 | Nu River             | Kuke River            | Mengboluo River      | 99.429 | 24.885 | 962  | 5.46 | 0.176  | 2.92 | Transient region; bed: sandy gravel                                                         |
| 114 | Nu River             | Yongkang River        | Mengboluo River      | 99.368 | 24.084 | 846  | 5.77 | 0.053  | 2.92 | Transient region; bed: fine sand and pebble; left bank: sloping farmland; right bank: hills |
| 115 | Nu River             | Mengboluo River       | Nu River             | 99.259 | 24.442 | 636  | 8.51 | 0.631  | 2.92 | Transient region; bed: sandy gravel; banks: sand and Rubble                                 |
| 116 | Nu River             | Nu River1             | Salween River        | 96.207 | 30.875 | 3160 | 6.78 | 6.938  | 2.92 | Inside the QTP; bed: bed rock; banks: rocks and pebble                                      |
| 117 | Nu River             | Nu River2             | Salween River        | 98.883 | 24.983 | 664  | 1.98 | 11.022 | 2.92 | Transient region; bed: bed rock; right bank: fine sandy soil; left bank: limestone          |
| 118 | Yarlung Zangbo River | Yarlung Zangbo River1 | Brahmaputra River    | 87.679 | 29.166 | 3973 | 2.05 | 4.937  | 2.51 | Inside the QTP; bed: sandy gravel                                                           |
| 119 | Yarlung Zangbo River | Yarlung Zangbo River2 | Brahmaputra River    | 89.712 | 29.33  | 3769 | 2.17 | 10.638 | 2.51 | Inside the QTP; bed: sandy gravel; left bank: big freestone                                 |
| 120 | Yarlung Zangbo River | Yarlung Zangbo River3 | Brahmaputra River    | 91.883 | 29.276 | 3543 | 1.84 | 15.319 | 2.51 | Inside the QTP; bed: sandy gravel; banks: hillslope                                         |
| 121 | Yarlung Zangbo River | Yarlung Zangbo River4 | Brahmaputra River    | 94.567 | 29.459 | 2918 | 0.63 | 18.984 | 2.51 | Inside the QTP; bed: fine sand; right bank: pebble; left bank: bed rock                     |
| 122 | Yarlung Zangbo River | Duiling Qu River      | Lhasa River          | 90.55  | 30.083 | 4269 | 7.32 | 0.263  | 1.99 | Inside the QTP; bed: sandy gravel and freestone                                             |
| 123 | Yarlung Zangbo River | Lasa River1           | Yarlung Zangbo River | 91.382 | 30.141 | 4017 | 4.79 | 1.637  | 2.08 | Inside the QTP; bed: sand and small gravel                                                  |
| 124 | Yarlung Zangbo River | Lasa River2           | Yarlung Zangbo River | 91.781 | 29.888 | 3826 | 3.6  | 2.037  | 1.96 | Inside the QTP; bed: sandy gravel                                                           |
| 125 | Yarlung Zangbo River | Lasa River3           | Yarlung Zangbo River | 91.148 | 29.639 | 3653 | 2.38 | 2.623  | 1.90 | Inside the QTP; bed: sandy gravel                                                           |
| 126 | Yarlung Zangbo River | Niyang River1         | Yarlung Zangbo River | 93.25  | 29.885 | 3414 | 3.02 | 0.642  | 1.99 | Inside the QTP; bed: sandy gravel and freestone                                             |
| 127 | Yarlung Zangbo River | Niyang River2         | Yarlung Zangbo River | 94.15  | 29.742 | 3060 | 2.57 | 1.56   | 1.99 | Inside the QTP; bed: sandy gravel and freestone                                             |
| 128 | Yarlung Zangbo River | Nianchu River1        | Yarlung Zangbo River | 89.604 | 28.903 | 4025 | 4.02 | 0.622  | 1.98 | Inside the QTP; bed: sandy gravel                                                           |
| 129 | Yarlung Zangbo River | Nianchu River2        | Yarlung Zangbo River | 88.89  | 29.283 | 3833 | 2.03 | 1.112  | 2.12 | Inside the QTP; bed: sandy gravel                                                           |

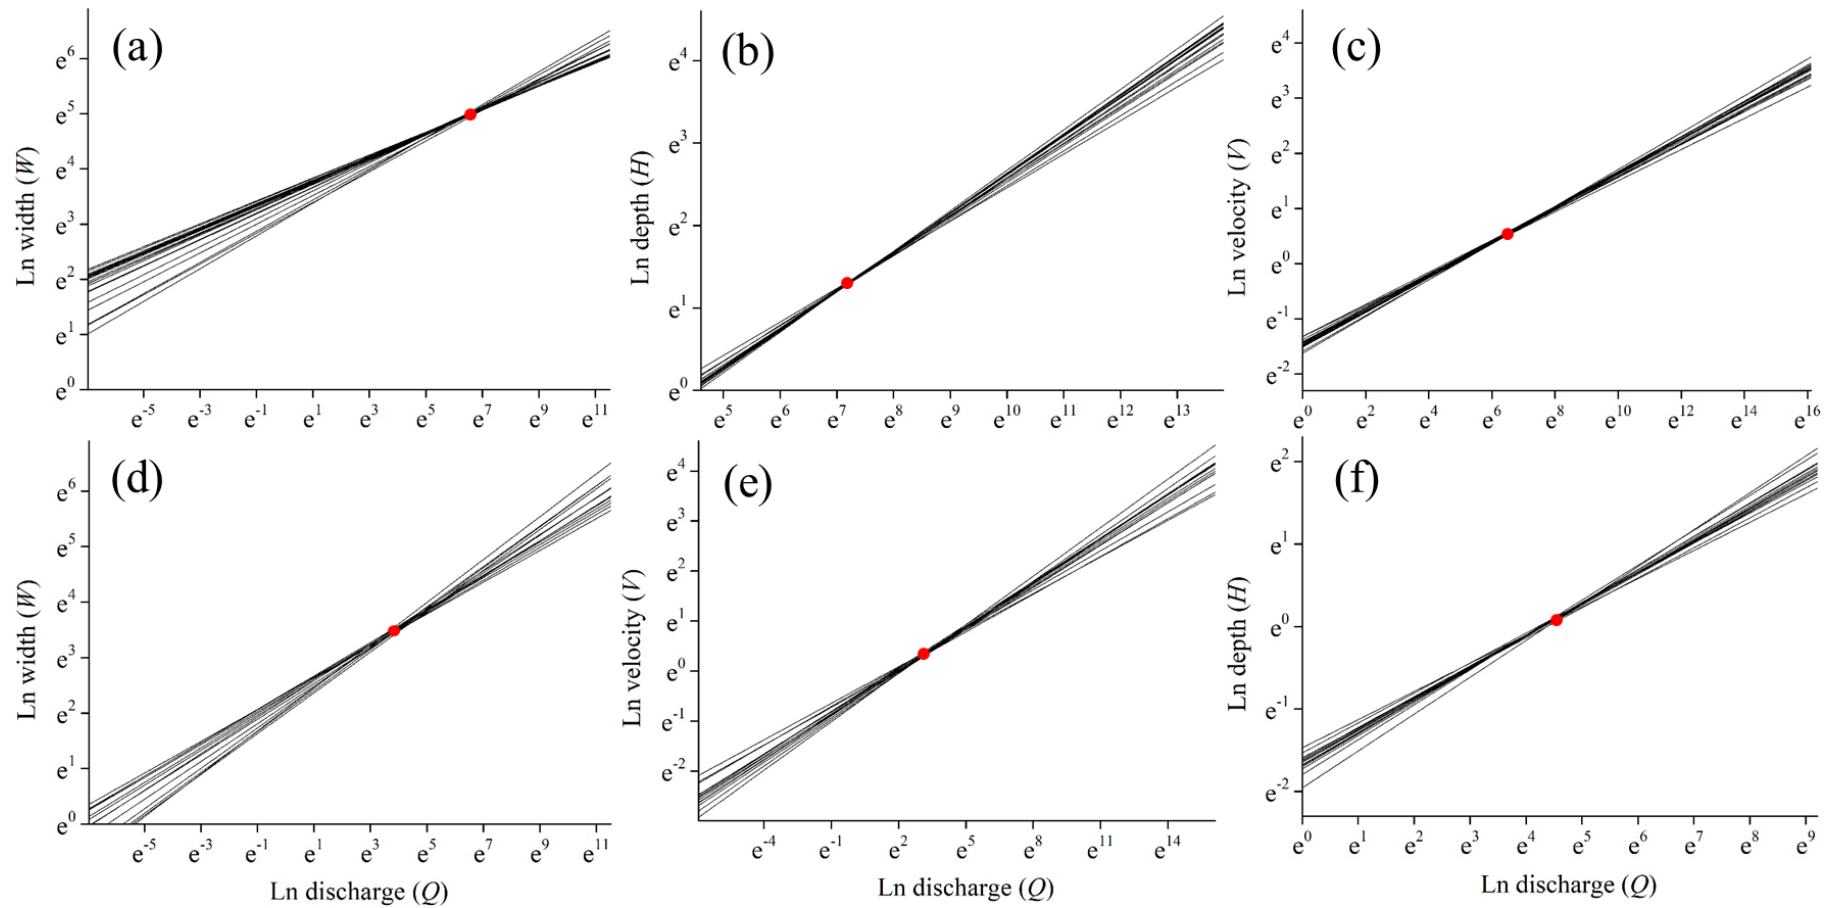

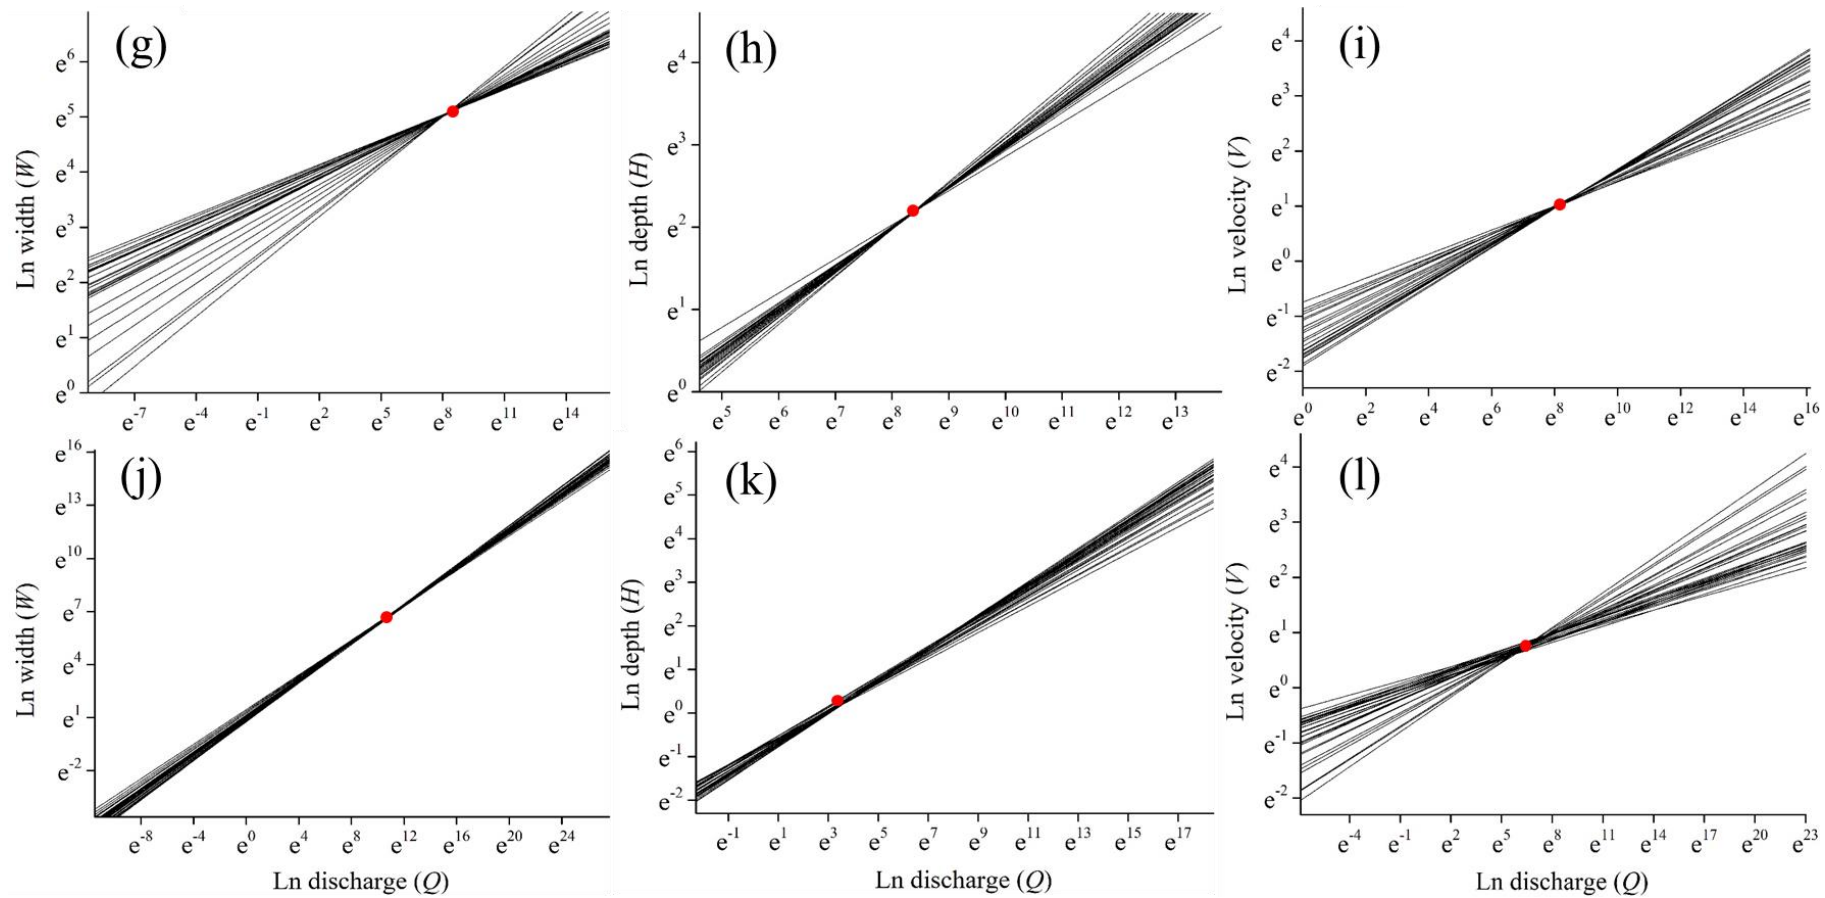



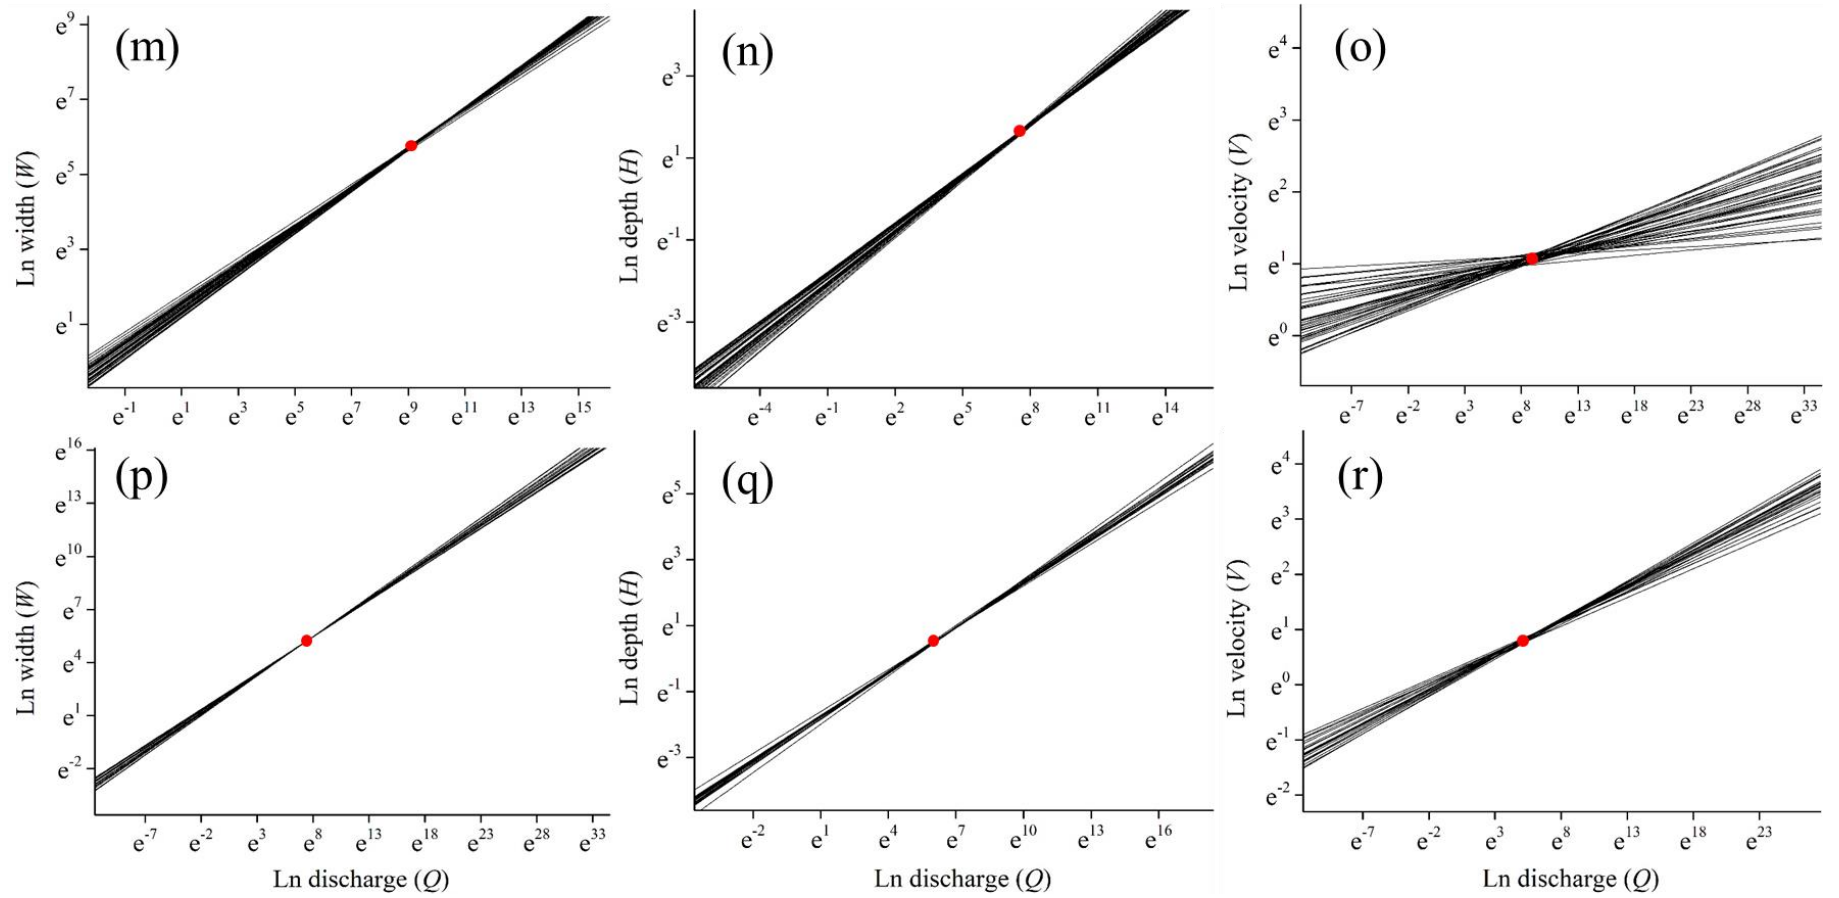

**Figure S1.** Convergence of DHG curves of the main stream of the upper Yellow River (a-c), the mainstream of the Huangshui River (d-f), the mainstream of the upper Jinsha River (g-i), the tributaries of the Lantsang River (j-l), the mainstream and the tributaries of the Nu River (m-o), the mainstream and the tributaries of the Yarlung Zangbo River (p-r) under multiple discharge frequencies. Red dots represent the congruent discharge which indicate the convergence of individual DHG curves.
